# Supplementary material for: Crystal structures and electronic properties in 3d transition metal doped SrRuO3
Source: Royal Society of Chemistry journal article supplement (doi:10.1039/c9dt00432g), 2019-01-01
Supplement: c9dt00432g1.pdf [file c9dt00432g1.pdf]

## Crystal structures and electronic properties in 3d transition metal doped SrRuO<sub>3</sub>.

Ilyas Qasim<sup>1,2</sup>, Peter E.R. Blanchard<sup>1,3</sup>, Kevin S. Knight<sup>4,5</sup>, Jimmy Ting<sup>1</sup> and Brendan J. Kennedy<sup>1\*</sup>

1. School of Chemistry, the University of Sydney, Sydney, NSW 2006 Australia
2. School of Environment, University of Auckland, Auckland, 1142 New Zealand
3. Canadian Light Source, Saskatoon, SK, S7N 2V3, Canada
4. Department of Earth Sciences, University College London, Gower Street, London, WC1E 6BT, U.K.
5. Department of Earth Sciences, The Natural History Museum, Cromwell Road, London, SW7 5BR, U.K.

\* To whom correspondence should be addressed

Professor Brendan J. Kennedy

School of Chemistry

The University of Sydney

Sydney, NSW 2006 AUSTRALIA

Ph +61 2 9351 2742

Fax + 61 2 9351 3329

E-mail. [Brendan.Kennedy@Sydney.edu.au](mailto:Brendan.Kennedy@Sydney.edu.au)

ESI

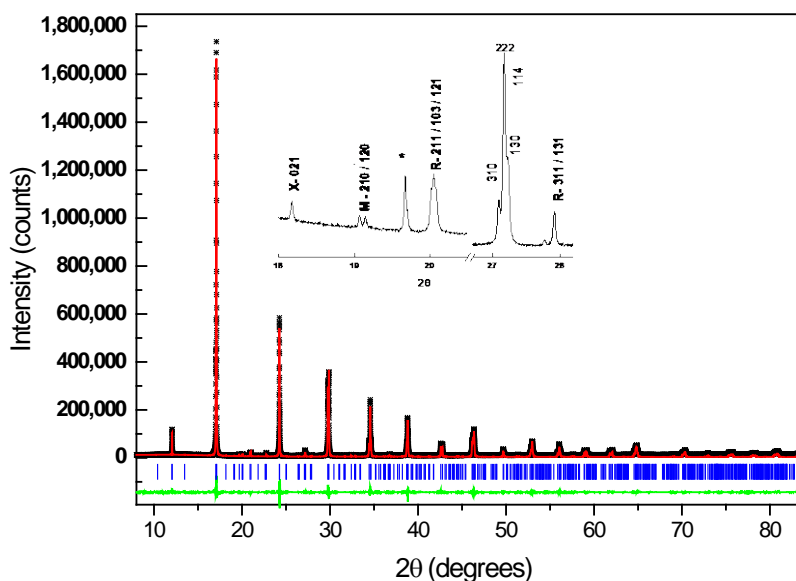

Figure S1a. Observed (black symbols), calculated (red line) and difference (green line) S-XRD profiles for  $\text{SrRu}_{0.8}\text{Ni}_{0.2}\text{O}_3$  at room temperature. The structure was refined in space group  $Pbnm$ . A small amount of NiO (0.43 wt %) marked by \* is evident in the inset.

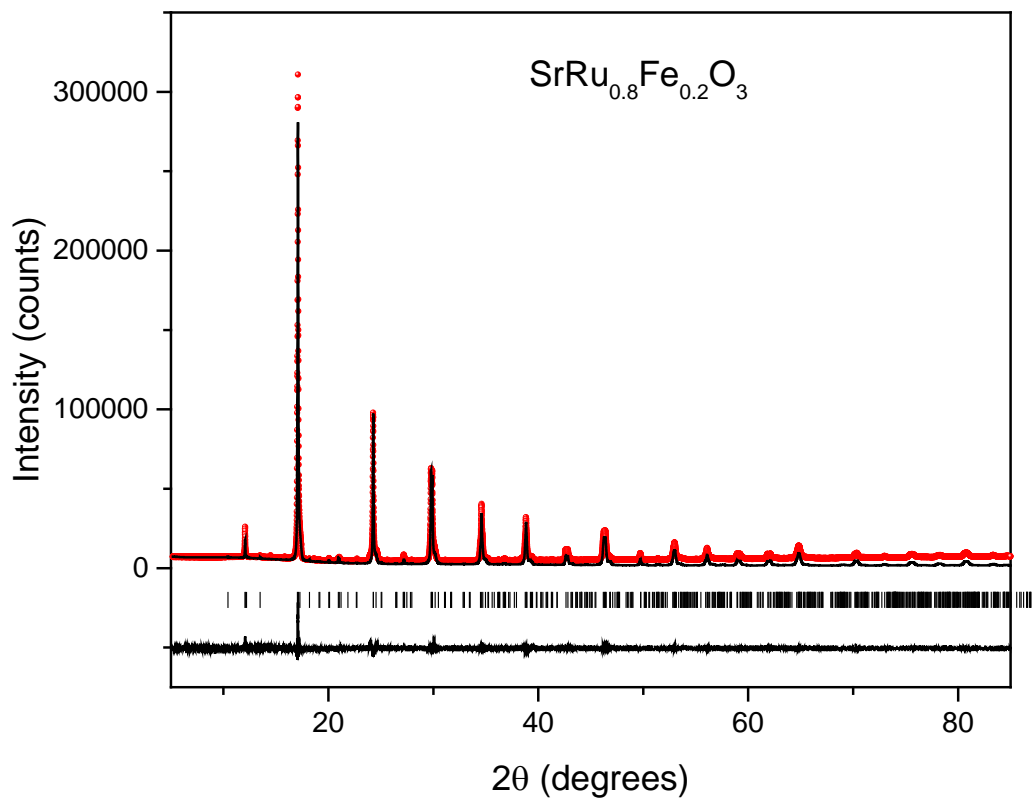

Figure S1b Observed (black symbols), calculated (red line) and difference (green line) S-XRD profiles for  $\text{SrRu}_{0.8}\text{Fe}_{0.2}\text{O}_3$  at room temperature. The structure was refined in space group  $Pbnm$ .

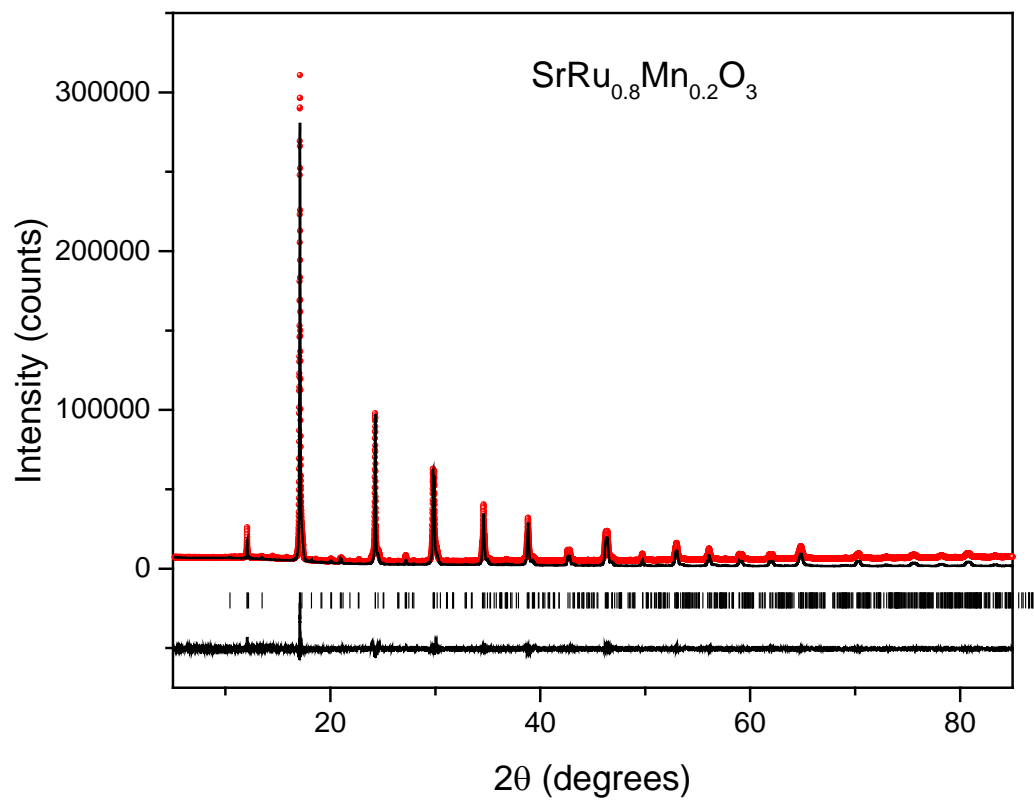

Figure S1c Observed (black symbols), calculated (red line) and difference (green line) S-XRD profiles for  $\text{SrRu}_{0.8}\text{Fe}_{0.2}\text{O}_3$  at room temperature. The structure was refined in space group *Pbnm*.

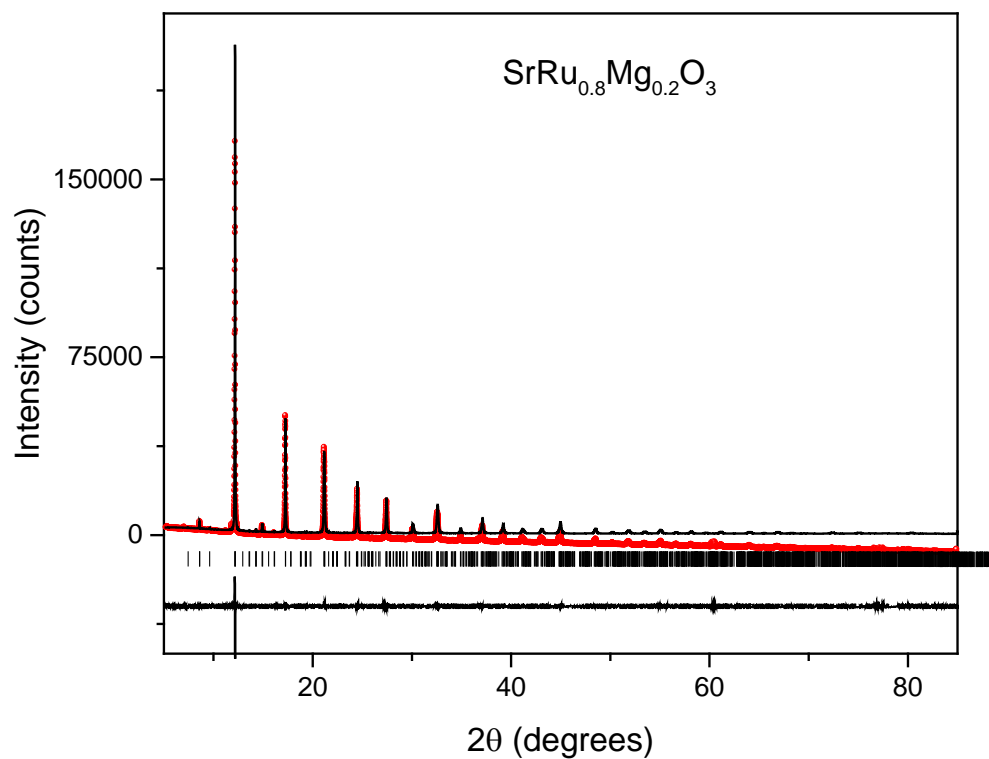

Figure S1d Observed (black symbols), calculated (red line) and difference (green line) S-XRD profiles for  $\text{SrRu}_{0.8}\text{Mg}_{0.2}\text{O}_3$  at room temperature. The structure was refined in space group *Pbnm*.

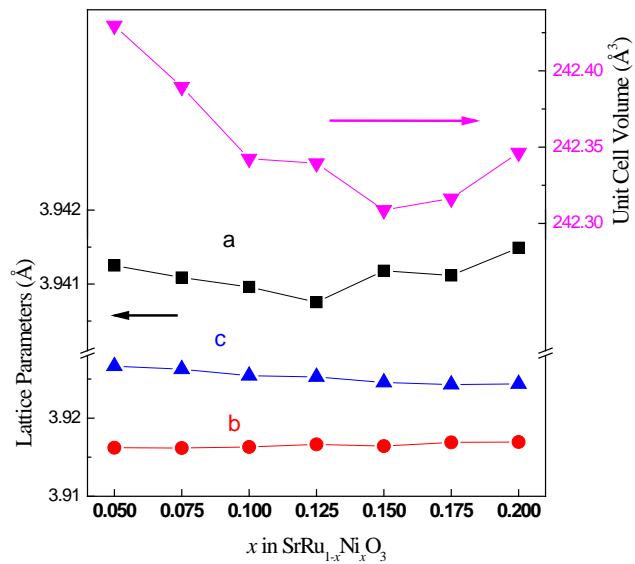

Figure S2. Composition dependence of the unit cell volume (upper), and lattice parameters (lower) from SXRD refinements for SrRu<sub>1-x</sub>Ni<sub>x</sub>O<sub>3</sub>. All the parameters are normalised ( $a/\sqrt{2}$ ,  $b/\sqrt{2}$ ,  $c/2$ ) with respect to the cubic cell for comparison.

Table S1. Refined structural parameters for SrRu<sub>1-x</sub>Ni<sub>x</sub>O<sub>3</sub> at room temperature from S-XRD analysis ( $\lambda = 0.82544\text{\AA}$ ; space group *Pbnm*.)

| $x =$                    | 0.05                  | 0.075                 | 0.1                   | 0.125                 | 0.15                  | 0.175                 | 0.2                   |
|--------------------------|-----------------------|-----------------------|-----------------------|-----------------------|-----------------------|-----------------------|-----------------------|
| tolerance factor ( $t$ ) | 0.9951                | 0.9956                | 0.9961                | 0.9966                | 0.9971                | 0.9976                | 0.9981                |
| $a$ (Å)                  | 5.57378(2)            | 5.57354(2)            | 5.57336(1)            | 5.57307(2)            | 5.57367(1)            | 5.57359(2)            | 5.57411(2)            |
| $b$ (Å)                  | 5.53838(2)            | 5.53833(2)            | 5.53850(1)            | 5.53898(2)            | 5.53866(1)            | 5.53934(2)            | 5.53941(2)            |
| $c$ (Å)                  | 7.85334(3)            | 7.85252(3)            | 7.85088(2)            | 7.85055(3)            | 7.84912(2)            | 7.84857(3)            | 7.84875(4)            |
| vol (Å <sup>3</sup> )    | 242.430(2)            | 242.393(8)            | 242.393(2)            | 242.339(1)            | 242.308(1)            | 242.317(2)            | 242.348(2)            |
| R <sub>p</sub> (%)       | 4.35                  | 4.29                  | 3.77                  | 3.83                  | 3.99                  | 4.33                  | 5.33                  |
| R <sub>wp</sub> (%)      | 5.83                  | 5.82                  | 5.07                  | 4.95                  | 5.28                  | 6.08                  | 8.03                  |
| $\chi^2$                 | 31.67                 | 31.97                 | 21.05                 | 19.86                 | 23.47                 | 33.64                 | 69.25                 |
| Ru/Ni-O1 (Å)             | 1.9893(10)            | 1.9874(8)             | 1.9843(5)             | 1.9850(6)             | 1.9836(5)             | 1.9887(7)             | 1.9824(8)             |
| Ru/Ni-O2 (Å)             | 1.950(4)              | 1.958(4)              | 1.963(4)              | 1.959(4)              | 1.969(4)              | 1.968(5)              | 1.957(6)              |
| Ru/Ni-O2 (Å)             | 2.006(4)              | 2.000(4)              | 1.991(4)              | 1.994(4)              | 1.984(4)              | 1.981(5)              | 1.996(6)              |
| BVS (Ru)                 | 4.03                  | 4.03                  | 4.05                  | 4.06                  | 4.05                  | 4.06                  | 4.06                  |
| BVS (Zn)                 | 2.48                  | 2.48                  | 2.49                  | 2.50                  | 2.49                  | 2.49                  | 2.50                  |
| Oh distortion            | $4.21 \times 10^{-4}$ | $2.27 \times 10^{-4}$ | $1.09 \times 10^{-4}$ | $1.69 \times 10^{-4}$ | $0.37 \times 10^{-4}$ | $0.56 \times 10^{-4}$ | $2.00 \times 10^{-4}$ |
| (+) Oh tilting (°)       | 4.43                  | 4.61                  | 3.96                  | 3.97                  | 3.83                  | 3.75                  | 3.61                  |
| (-) Oh tilting (°)       | 8.18                  | 8.12                  | 7.85                  | 7.75                  | 7.83                  | 7.79                  | 7.72                  |

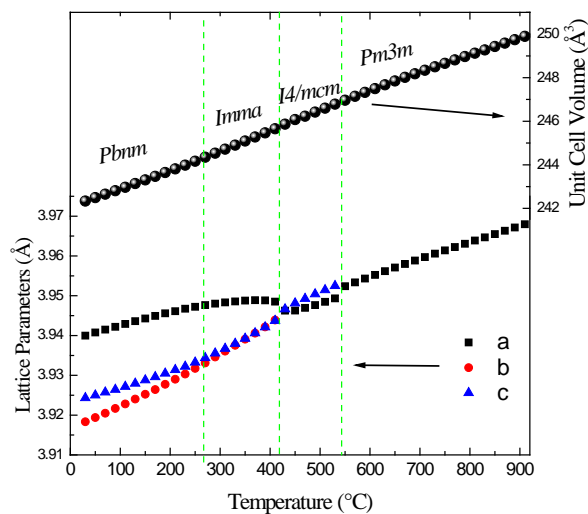

Figure S3. Temperature dependence of the, appropriately scaled, lattice parameters and unit cell volume for  $\text{SrRu}_{0.8}\text{Co}_{0.2}\text{O}_3$  as obtained from SXRD measurements.

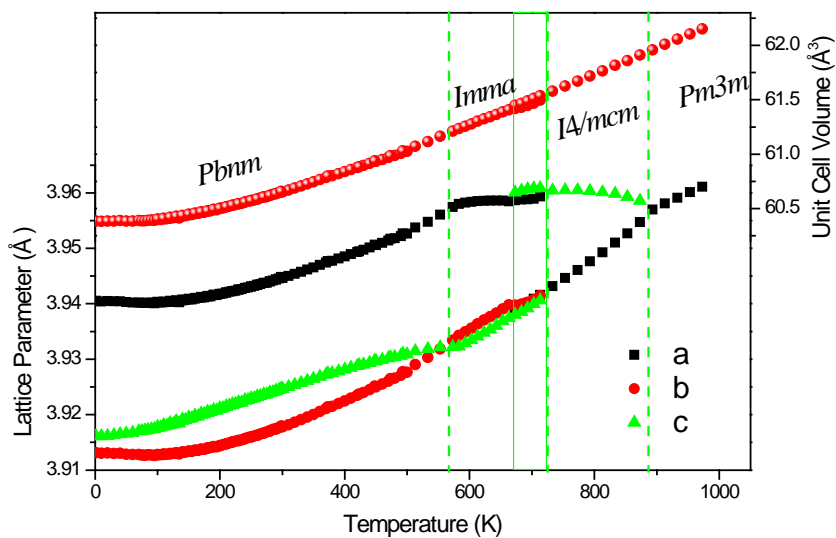

Figure S4. Temperature dependence of the, appropriately scaled, lattice parameters and unit cell volume for  $\text{SrRu}_{0.9}\text{Cu}_{0.1}\text{O}_3$  as obtained from SXRD measurements and ND measurement (low temperature region). The hatched region is where the two-phases co-exist.

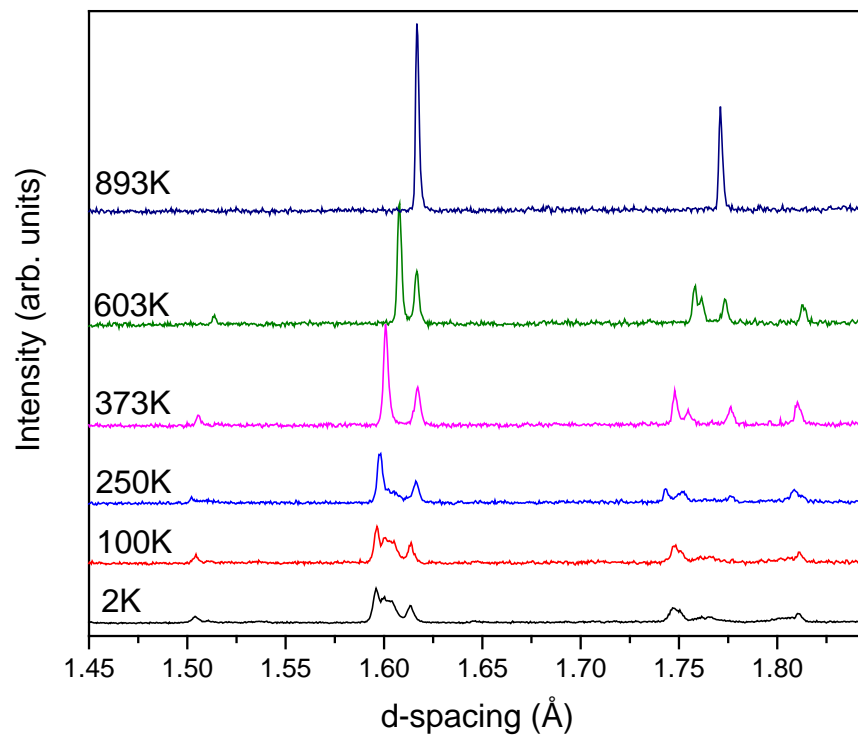

Figure S5 Portions of the neutron diffraction profiles for SrRu<sub>0.8</sub>Cu<sub>0.2</sub>O<sub>3</sub> as a function of temperature.
